# Supplementary material
Source: PubMed Central journal article supplement (PMC4338984)
Supplement: NIHMS664737-supplement-Suppl.pdf [file NIHMS664737-supplement-Suppl.pdf]

## **Sex and Hemodynamics in Pulmonary Arterial Hypertension**

### **Supplementary Material**

**Figure E1. Least square means of baseline hemodynamics by sex and age with adjustment for race, height, weight, and study in subjects connective tissue disease-associated pulmonary arterial hypertension.**

Marker=point estimate; whiskers=95% confidence interval

RAP=right atrial pressure; MPAP=mean pulmonary artery pressure; CO=cardiac output;

PCWP=pulmonary capillary wedge pressure; PVR=pulmonary vascular resistance

**Table E1. Baseline characteristics of the study sample with connective tissue disease associated-pulmonary arterial hypertension, by sex**

| Variable                                                       | Sex          |              | P value |
|----------------------------------------------------------------|--------------|--------------|---------|
|                                                                | Men          | Women        |         |
| Number                                                         | 61           | 428          |         |
| Age, yr                                                        | 56.9 ± 10.9  | 54.2 ± 13.8  | 0.22    |
| Race, n (%)                                                    |              |              | 0.21    |
| Caucasian                                                      | 56 (91.8)    | 344 (80.4)   |         |
| African-American                                               | 3 (4.9)      | 28 (6.5)     |         |
| Asian                                                          | 0 (0.0)      | 21 (4.9)     |         |
| Hispanic                                                       | 2 (3.3)      | 30 (7.0)     |         |
| Other                                                          | 0 (0.0)      | 5 (1.2)      |         |
| Height, cm                                                     | 175.4 ± 7.4  | 159.8 ± 7.2  | <0.001  |
| Weight, kg                                                     | 80.9 ± 13.4  | 67.2 ± 16.6  | <0.001  |
| BMI, kg/m <sup>2</sup>                                         | 26.3 ± 4.0   | 26.3 ± 6.0   | 0.27    |
| Warfarin use, n (%)                                            | 24 (42.9)    | 227 (57.5)   | 0.04    |
| Study, n (%)                                                   |              |              | 0.68    |
| AIR                                                            | 5 (8.2)      | 24 (5.6)     |         |
| AIR-II                                                         | 0 (0.0)      | 4 (0.9)      |         |
| ARIES-1                                                        | 5 (8.2)      | 51 (11.9)    |         |
| ARIES-2                                                        | 9 (14.8)     | 48 (11.2)    |         |
| Bosentan 351                                                   | 0 (0.0)      | 5 (1.2)      |         |
| BREATHE-1                                                      | 8 (13.1)     | 38 (8.9)     |         |
| STRIDE-1                                                       | 3 (4.9)      | 39 (9.1)     |         |
| STRIDE-2                                                       | 8 (13.1)     | 63 (14.7)    |         |
| STRIDE-4                                                       | 1 (1.6)      | 13 (3.0)     |         |
| SUPER                                                          | 13 (21.3)    | 64 (15.0)    |         |
| Treprostinil                                                   | 9 (14.8)     | 79 (18.5)    |         |
| NYHA functional class, n (%)                                   |              |              | 0.58    |
| I                                                              | 1 (1.7)      | 8 (1.9)      |         |
| II                                                             | 23 (38.3)    | 171 (40.4)   |         |
| III                                                            | 35 (58.3)    | 221 (52.2)   |         |
| IV                                                             | 1 (1.7)      | 23 (5.4)     |         |
| Baseline 6MWD, m                                               | 348.0 ± 89.0 | 320.6 ± 87.0 | 0.02    |
| Baseline hemodynamics*                                         |              |              |         |
| Right atrial pressure, mm Hg                                   | 9.5 ± 5.5    | 8.0 ± 5.1    | 0.03    |
| Mean pulmonary artery pressure, mm Hg                          | 45.9 ± 10.9  | 46.0 ± 12.5  | 0.80    |
| Cardiac output, L/min                                          | 4.7 ± 1.4    | 4.2 ± 1.5    | 0.01    |
| Cardiac index, L/min/m <sup>2</sup>                            | 2.4 ± 0.6    | 2.5 ± 0.8    | 0.39    |
| Pulmonary capillary wedge pressure, mm Hg                      | 9.1 ± 3.0    | 9.0 ± 3.6    | 0.67    |
| Pulmonary vascular resistance, Wood units                      | 9.3 ± 5.5    | 10.7 ± 6.7   | 0.29    |
| Pulmonary vascular resistance index, Wood units•m <sup>2</sup> | 18.4 ± 11.7  | 18.1 ± 11.2  | 0.43    |

---

Data are shown as mean  $\pm$  standard deviation or percentage. \*Unadjusted values. BMI=body mass index; AIR=Aerosolized Iloprost Randomized; ARIES=Ambrisentan in Pulmonary Arterial Hypertension, Randomized, Double-Blind, Placebo-Controlled, Multicenter Efficacy Studies; BREATHE=Bosentan: Randomized Trial of Endothelin receptor Antagonist Therapy; STRIDE=Sitaxsentan To Relieve Impaired Exercise; SUPER=Sildenafil Use in Pulmonary Hypertension; NYHA=New York Heart Association; 6MWD=six-minute walk distance.

**Table E2. Associations between sex and baseline hemodynamics in subjects with connective tissue disease-associated pulmonary arterial hypertension**

| Variable                                                         | Age | Difference between men and women | 95% CI       | P value |
|------------------------------------------------------------------|-----|----------------------------------|--------------|---------|
| Right atrial pressure, mm Hg                                     | .   | 1.60                             | -0.04 – 3.25 | 0.06    |
| Mean pulmonary artery pressure, mm Hg*                           | .   | 1.09                             | -2.84 – 5.02 | 0.56    |
| Cardiac output, L/min                                            | .   | -0.19                            | -0.63 – 0.25 | 0.40    |
| Cardiac index, L/min/m <sup>2</sup> *                            | .   | -0.11                            | -0.31 – 0.10 | 0.29    |
| Pulmonary capillary wedge pressure, mm Hg                        | .   | -0.60                            | -1.75 – 0.56 | 0.31    |
| Pulmonary vascular resistance, Wood units                        | .   | 0.45                             | -1.62 – 2.53 | 0.67    |
| Pulmonary vascular resistance index, Wood units•m <sup>2</sup> * | .   | 0.60                             | -2.31 – 3.52 | 0.68    |

All models adjusted for age, race, height, weight, study except for cardiac index and pulmonary vascular resistance index. \*Adjusted for age, race, study.
